# Supplementary material for: The PRESSURE score to predict decompressive craniectomy after aneurysmal subarachnoid haemorrhage
Source: PubMed Central journal article supplement — Brain Commun. 2020 Sep 17;2(2):fcaa134. doi: 10.1093/braincomms/fcaa134 (PMC7660044; doi:10.1093/braincomms/fcaa134), 2020-09-17
Supplement: fcaa134_supplementary_data.pdf [file fcaa134_supplementary_data.pdf]

## **SUPPLEMENTARY MATERIALS**

### **The PRESSURE score to predict decompressive craniectomy after aneurysmal subarachnoid hemorrhage**

*Ramazan Jabbarli*<sup>1, 2</sup>, MD ([Ramazan.jabbarli@uk-essen.de](mailto:Ramazan.jabbarli@uk-essen.de)); *Marvin Darkwah Oppong*<sup>1</sup>, MD ([marvin.darkwahoppong@uk-essen.de](mailto:marvin.darkwahoppong@uk-essen.de)); *Roland Roelz*<sup>2</sup>, MD ([roland.roelz@uniklinik-freiburg.de](mailto:roland.roelz@uniklinik-freiburg.de)); *Daniela Pierscianek*<sup>1</sup>, MD ([daniela.pierscianek@uk-essen.de](mailto:daniela.pierscianek@uk-essen.de)); *Mukesch Shah*<sup>2</sup>, MD ([mukesch.shah@uniklinik-freiburg.de](mailto:mukesch.shah@uniklinik-freiburg.de)); *Philipp Dammann*<sup>1</sup>, MD ([philipp.dammann@uk-essen.de](mailto:philipp.dammann@uk-essen.de)); *Christian Scheiwe*<sup>2</sup>, MD ([christian.scheiwe@uniklinik-freiburg.de](mailto:christian.scheiwe@uniklinik-freiburg.de)); *Klaus Kaier*<sup>3</sup>, PhD ([kaier@imbi.uni-freiburg.de](mailto:kaier@imbi.uni-freiburg.de)); *Karsten H Wrede*<sup>1</sup>, MD ([karsten.wrede@uk-essen.de](mailto:karsten.wrede@uk-essen.de)); *Jürgen Beck*<sup>2</sup>, MD ([juergen.beck.nch@uniklinik-freiburg.de](mailto:juergen.beck.nch@uniklinik-freiburg.de)); *Ulrich Sure*<sup>1</sup>, MD ([ulrich.sure@uk-essen.de](mailto:ulrich.sure@uk-essen.de))

1 – Department of Neurosurgery, University Hospital of Essen, Germany;

2 – Department of Neurosurgery, Medical Center - University of Freiburg, Germany;

3 – Institute of Medical Biometry and Statistics, Faculty of Medicine and Medical Center – University of Freiburg  
Institute for Medical Biometry and Medical Informatics, University Medical Center Freiburg, Germany

#### **CORRESPONDING AUTHOR:**

Ramazan Jabbarli, MD

Department of Neurosurgery

University Hospital of Essen,

D-45147 Essen, Germany

E-mail: [ramazan.jabbarli@uk-essen.de](mailto:ramazan.jabbarli@uk-essen.de)

ORCID: 0000-0002-8356-6629

Phone: +49 201 723 1201

Fax: +49 201 723 5991

**Supplementary Table 1:** Basic demographic, radiographic and clinical characteristics of the test and validation cohorts

| Parameter                                | Mean values ( $\pm$ SD) or Percentage |                          | p-value |
|------------------------------------------|---------------------------------------|--------------------------|---------|
|                                          | <i>test cohort</i>                    | <i>validation cohort</i> |         |
| Cohort                                   |                                       |                          |         |
| Number of patients                       | 822                                   | 554                      | -       |
| Age (years)                              | 54.4 ( $\pm$ 13.5)                    | 55 ( $\pm$ 13.6)         | 0.3609  |
| Sex, (female)                            | 67%                                   | 64.1%                    | 0.2710  |
| Hunt & Hess scale (grade)                | 3.0 ( $\pm$ 1.3)                      | 2.9 ( $\pm$ 1.2)         | 0.0800  |
| Fisher scale (grade)                     | 3.3 ( $\pm$ 0.7)                      | 3.3 ( $\pm$ 0.8)         | 0.7788  |
| Aneurysm location (anterior circulation) | 71.9%                                 | 74.4%                    | 0.3230  |
| Aneurysm size (mm)                       | 7.2 ( $\pm$ 4.5)                      | 7.1 ( $\pm$ 4.5)         | 0.6951  |
| Treatment modality (clipping)            | 39.7%                                 | 38.1%                    | 0.5734  |

**Supplementary Table 2:** Multivariate analysis of PrimDC and SecDC predictors in the test cohort

| Predictors of PrimDC                 |        |        |        |         |
|--------------------------------------|--------|--------|--------|---------|
| Parameter                            | aOR    | 95% CI |        | p-value |
| Younger age (<55 years old)          | 2.43   | 1.26   | 4.67   | 0.008   |
| Hunt & Hess scale, (IV – V)          | 2.38   | 1.19   | 4.76   | 0.015   |
| Aneurysm size (>5 mm)                | 3.08   | 1.53   | 6.21   | 0.002   |
| Treatment modality (clipping)        | 137.86 | 48.94  | 388.36 | <0.0001 |
| Presence of ICH*                     | 10.81  | 5.19   | 22.51  | <0.0001 |
| Angiographic vasospasm               | 3.44   | 1.21   | 9.79   | 0.021   |
| Early infarction                     | 2.39   | 1.24   | 4.61   | 0.009   |
| Rebleeding                           | 3.34   | 0.87   | 12.74  | 0.078   |
| Fisher scale, (III – IV)             | 4.0    | 0.59   | 27.05  | 0.153   |
| Aneurysm in the anterior circulation | 0.89   | 0.36   | 2.21   | 0.798   |
| WBC count (>11× 10 <sup>9</sup> /L)  | 1.65   | 0.78   | 3.47   | 0.189   |
| Dilated/fixed pupils                 | 1.52   | 0.53   | 4.35   | 0.434   |
| Predictors of SecDC                  |        |        |        |         |
| Younger age (<55 years old)          | 4.07   | 2.06   | 8.07   | <0.0001 |
| Aneurysm size (>5 mm)                | 2.35   | 1.25   | 4.44   | 0.008   |
| Treatment modality (clipping)        | 2.98   | 1.53   | 5.84   | 0.001   |
| Need for EVD                         | 3.07   | 1.25   | 7.55   | 0.014   |
| Presence of ICH                      | 2.64   | 1.38   | 5.04   | 0.003   |
| Early infarction                     | 2.65   | 1.45   | 4.83   | 0.001   |
| Angiographic vasospasm               | 3.38   | 1.65   | 6.94   | 0.001   |
| Aneurysm in the anterior circulation | 2.09   | 0.95   | 4.58   | 0.065   |
| Hunt & Hess scale, (IV – V)          | 1.65   | 0.86   | 3.16   | 0.129   |
| WBC count (>11× 10 <sup>9</sup> /L)  | 2.21   | 0.69   | 7.10   | 0.170   |

**Abbreviations:** ICH – intracerebral hemorrhage, WBC – white blood cells, EVD – external ventricular drainage, \* - according to the ROC curve for the association between the ICH volume and the need for PrimDC, the clinically relevant cutoff was 1 ml. Therefore, ICH volume was excluded from the multivariate analysis due to overlapping with the variable “Presence of ICH”.

**Supplementary Table 3:** Multivariate analysis of the outcome endpoints (unfavorable outcome at 6 months and in-hospital mortality) in the pooled sub-cohort of SAH individuals with the PRESSURE score  $\geq 6$  points and absence of brainstem herniation signs at admission

| Parameter             | Unfavorable Outcome |        |      |         | In-Hospital Mortality |        |       |         |
|-----------------------|---------------------|--------|------|---------|-----------------------|--------|-------|---------|
|                       | aOR                 | 95% CI |      | p-value | aOR                   | 95% CI |       | p-value |
| DC within 24h         | 0.19                | 0.07   | 0.48 | <0.0001 | 0.24                  | 0.07   | 0.78  | 0.018   |
| Cohort                | 0.49                | 0.22   | 1.06 | 0.071   | 1.04                  | 0.47   | 2.29  | 0.925   |
| PRESSURE score        | 2.08                | 1.26   | 3.46 | 0.004   | 1.34                  | 0.81   | 2.23  | 0.259   |
| Age, <55 years        | 0.04                | 0.01   | 0.35 | 0.003   | 2.13                  | 0.54   | 8.36  | 0.278   |
| Sex, female           | 1.31                | 0.65   | 2.64 | 0.446   | 1.61                  | 0.74   | 3.50  | 0.231   |
| Hunt&Hess, Gr. 4-5    | 0.89                | 0.37   | 2.16 | 0.803   | 5.19                  | 1.14   | 23.56 | 0.033   |
| Fisher grade, Gr. 3-4 | $1.4 * 10^9$        | -      |      | 0.999   | $2.6 * 10^8$          | -      |       | 0.999   |

**Abbreviations:** aOR – adjusted odds ratio; CI – confidence interval. Since only 4 individuals in this subgroup presented with low Fisher Grade (1 or 2), confidence intervals for this parameter were not calculated by the SPSS software.
